# Supplementary material for: Hematopoietic Stem Cell Heterogeneity Is Linked to the Initiation and Therapeutic Response of Myeloproliferative Neoplasms
Source: PubMed Central journal article supplement — Cell Stem Cell. Author manuscript; Available in PMC 2022 Aug 13. (PMC7613297; doi:10.1016/j.stem.2021.02.026), 2021-04-01
Supplement: EMS151252-supplement-Supplementary_Material.pdf [file EMS151252-supplement-Supplementary_Material.pdf]

mutant cell proliferation. This finding might explain the competitive advantage of mutant HSCs over WT HSCs in *Jak2V617F* mice (Dunbar et al., 2017). Thus, mutant, Mk-primed HSCs and elevated IFN signaling are of importance in onset and progression of *JAK2V617F*<sup>+</sup> ET. We propose a model in which *JAK2V617F* mutation occurs in Mk-primed HSCs, leading to expansion of this population and hypersensitivity to IFN signaling, which promotes Mk lineage differentiation. An alternative mechanism cannot be ruled out where the bone marrow microenvironment (e.g., enhanced IFN signaling) is altered to preferentially promote Mk differentiation with subsequent acquisition of *JAK2V617F* in Mk-primed HSCs, which further accelerates Mk production (Figure S4G).

The association between stem cell heterogeneity and therapeutic effects in ET was studied further here. We found that the *JAK2V617F*<sup>+</sup> Mk-primed HSC compartment was reduced in individuals with ET after treatment. Prior studies in MPN mice (predominantly manifesting PV phenotypes) have demonstrated that IFN $\alpha$  can directly target *Jak2V617F*<sup>+</sup> HSCs through pro-apoptosis or proliferation-associated exhaustion (Austin et al., 2020; Hasan et al., 2013; Mullally et al., 2013). We observed this pro-apoptotic effect in HET mutant HSCs in individuals with ET after treatment, whereas cell cycling was enhanced only moderately. Interestingly, HOMO cells seemed to re-enter quiescence through restoration of the TSC-mTOR signaling pathway or TP53 activation, implying that these mutant, quiescent cells are preserved and serve as residual disease-initiating stem cells. Molecular remission can be achieved by IFN $\alpha$  treatment (Hasselbaich and Holmström, 2019); however, rapid molecular relapse occurs in some individuals after IFN $\alpha$  discontinuation (Ishii et al., 2007). Our findings imply that relapsing cells might originate from quiescent mutant HSCs in individuals with T-ET. Thus, our results suggest that transient, low-dose IFN stimulation promotes proliferation and differentiation of *JAK2V617F*<sup>+</sup> Mk-primed HSCs during disease onset, whereas, upon treatment (including a chronic, therapeutic dose of IFN $\alpha$ ), the mutant Mk-primed HSC population was reduced by promoting apoptosis or quiescence of mutant cells.

Because HSC heterogeneity underlies the disparate phenotypes of MPNs harboring the same initiating mutation, malignant transformation of neoplasms might involve a specific subset of stem cells within a heterogeneous stem cell population. This concept might inform pathogenic mechanisms and potential therapeutic strategies for various cancer stem cell heterogeneities.

### Limitations of Study

This study is limited by the small number of samples collected and the complexity of the therapies received by these individuals, which remains to be investigated further. Additionally, the cellular and molecular basis of the changes in HSCs of individuals with PV upon treatment remains to be established.

### STAR★METHODS

Detailed methods are provided in the online version of this paper and include the following:

- KEY RESOURCES TABLE
- RESOURCE AVAILABILITY

- Lead contact
- Materials availability
- Data and code availability
- EXPERIMENTAL MODEL AND SUBJECT DETAILS
  - Human bone marrow (BM) from MPN patients and normal controls (NCs)
  - Human umbilical cord blood and cell culture
- METHOD DETAILS
  - Quantification of the *JAK2V617F* allele burden in patient samples
  - Isolation of BM-MNCs and HSCs
  - Bulk RNA-seq
  - TARGET-seq
  - Pre-processing of bulk RNA-seq data
  - Alignment and quantification of expression for bulk RNA-seq
  - T-distributed stochastic neighbor embedding (t-SNE) analysis for bulk RNA-seq
  - Pre-processing and quality control of single-cell RNA-seq
  - Self-organizing maps (SOMs)
  - Gene set enrichment analysis (GSEA)
  - Single-cell quantitative real-time PCR
  - *Ex vivo* megakaryocyte differentiation
  - Colony formation assay
  - Cytex Aurora flow cytometry assay
  - Immunocytochemical staining (ICC staining)
- QUANTIFICATION AND STATISTICAL ANALYSIS

### SUPPLEMENTAL INFORMATION

Supplemental Information can be found online at <https://doi.org/10.1016/j.stem.2021.01.018>.

### ACKNOWLEDGMENTS

This work was supported by the National Key Research and Development Program of China Stem Cell and Translational Research (2016YFA0102300, 2016YFA0100600, 2017YFA0103102, 2019YFA0801800, and 2019YFA0110802), the CAMS Initiative for Innovative Medicine (2016-I2M-1-018, 2016-I2M-3-002, 2016-I2M-3-015, 2016-I2M-1-017, 2019-I2M-1-006, and 2017-I2M-1-015), the CAMS Key Laboratory of Gene Therapy for Blood Diseases (2018PT31038), the National Natural Science Foundation (81870089, 81890990, 81470302, 81770104, 81600099, 81500084, 81770128, 82070109, 81730006, 62002153, 81700105, 81970121, and 82000136), the Tianjin Natural Science Foundation (19JCZDJC33000 and 18JCQNJC11900), the Beijing-Tianjin-Hebei Basic Research Project (18JCZDJC44600 and H2018206423), and Fundamental Research Funds for the Central Universities (3332020056). We thank Dr. H. Ema for insightful discussions and Dr. H. Shen (Cytex Biosciences) for technical support.

### AUTHOR CONTRIBUTIONS

J.T., T.S., S.M., Y.Z., M.J., Y.G., P.T., Ding Wang, Di Wang, and A.Z. performed the research and analyzed the data. P.Z., R.F., Z.X., J.Z., and R.Y. analyzed the data. Dong Wang, L.S., T.C., and L.Z. designed the experiments, analyzed the data, and wrote the paper. S.J.L., J.L., A.R.G., and E.H.B. designed the experiments and wrote the paper.

### DECLARATION OF INTERESTS

The authors declare no competing interests.
